# Supplementary material for: Metagenomic Insights into the Metabolic and Ecological Functions of Abundant Deep-Sea Hydrothermal Vent DPANN Archaea
Source: PubMed Central journal article supplement (PMC8091004; doi:10.1128/aem.03009-20), 2021-04-13
Supplement: AEM.03009-20-s0001.pdf [file AEM.03009-20-s0001.pdf]

# Supplementary information

## Metagenomic insights into the metabolic and ecological functions of abundant deep-sea hydrothermal vent DPANN archaea

Ruining Cai<sup>1,2,3,4</sup>, Jing Zhang<sup>1,2,3,4</sup>, Rui Liu<sup>1,2,4</sup>, Chaomin Sun<sup>1,2,4\*</sup>

<sup>1</sup>CAS Key Laboratory of Experimental Marine Biology & Center of Deep Sea Research, Institute of Oceanology, Chinese Academy of Sciences, Qingdao, China

<sup>2</sup>Laboratory for Marine Biology and Biotechnology, Pilot National Laboratory for Marine Science and Technology, Qingdao, China

<sup>3</sup>College of earth science, University of Chinese Academy of Sciences, Beijing, China

<sup>4</sup>Center of Ocean Mega-Science, Chinese Academy of Sciences, Qingdao, China

\* Corresponding author

Chaomin Sun      Tel.: +86 532 82898857; fax: +86 532 82898857.

E-mail address: [sunchaomin@qdio.ac.cn](mailto:sunchaomin@qdio.ac.cn)

**Table S1. The geographic positions of sampling sites and nearby hydrothermal vents.**

| <b>Type</b>              | <b>Name</b>                                | <b>Longitude<br/>(E, °)</b> | <b>Latitude<br/>(N, °)</b> |
|--------------------------|--------------------------------------------|-----------------------------|----------------------------|
| Nearby hydrothermal vent | Leyte                                      | 125.00                      | 11.00                      |
| Nearby hydrothermal vent | Philippine Ridge;<br>West Philippine Basin | 131.42                      | 12.00                      |
| Nearby hydrothermal vent | Batan                                      | 122.00                      | 20.00                      |
| Nearby hydrothermal vent | Taketomi Thermal Area                      | 124.10                      | 24.35                      |
| Nearby hydrothermal vent | Kueishan Island;                           | 122.00                      | 24.83                      |
| Nearby hydrothermal vent | Yonaguni Knoll IV                          | 122.70                      | 24.85                      |
| Nearby hydrothermal vent | SPOT; Hatoma Knoll                         | 123.84                      | 24.86                      |
| Nearby hydrothermal vent | SPOT; SPOT-5                               | 122.70                      | 24.87                      |
| Nearby hydrothermal vent | Yaeyama Graben                             | 124.88                      | 25.23                      |
| Nearby hydrothermal vent | Izena Cauldron                             | 127.08                      | 27.27                      |
| Nearby hydrothermal vent | Iheya Ridge                                | 126.98                      | 27.54                      |
| Nearby hydrothermal vent | Natsushima 84-1 Knoll                      | 127.14                      | 27.58                      |
| Nearby hydrothermal vent | North Knoll; Iheya Ridge                   | 126.90                      | 27.79                      |
| Nearby hydrothermal vent | Minami-Ensei Knoll                         | 127.64                      | 28.39                      |
| Nearby hydrothermal vent | Okinawa Trough;<br>Site ES2                | 128.10                      | 28.81                      |
| Nearby hydrothermal vent | Okinawa Trough;<br>Site ES1                | 129.08                      | 30.33                      |
| Nearby hydrothermal vent | Nagahama Bay;<br>Iwodake Volcano           | 130.33                      | 30.75                      |
| Nearby hydrothermal vent | Kagoshima Bay;<br>Sakura-jima Volcano      | 130.80                      | 31.65                      |
| Sampling site            | north-191                                  | 126.54                      | 27.47                      |
| Sampling site            | south                                      | 124.22                      | 25.15                      |

**Table S2. Marker genes used in phylogenetic analysis.**

| <b>ID</b>    | <b>Protein</b>                             |
|--------------|--------------------------------------------|
| DNGNGWU00001 | ribosomal protein S2 rpsB                  |
| DNGNGWU00002 | ribosomal protein S10 rpsJ                 |
| DNGNGWU00003 | ribosomal protein L1 rplA                  |
| DNGNGWU00005 | translation initiation factor IF-2         |
| DNGNGWU00006 | metalloendopeptidase                       |
| DNGNGWU00007 | ribosomal protein L22                      |
| DNGNGWU00009 | ribosomal protein L4/L1e rplD              |
| DNGNGWU00010 | ribosomal protein L2 rplB                  |
| DNGNGWU00011 | ribosomal protein S9 rpsI                  |
| DNGNGWU00012 | ribosomal protein L3 rplC                  |
| DNGNGWU00013 | phenylalanyl-tRNA synthetase beta subunit  |
| DNGNGWU00014 | ribosomal protein L14b/L23e rplN           |
| DNGNGWU00015 | ribosomal protein S5                       |
| DNGNGWU00016 | ribosomal protein S19 rpsS                 |
| DNGNGWU00017 | ribosomal protein S7                       |
| DNGNGWU00018 | ribosomal protein L16/L10E rplP            |
| DNGNGWU00019 | ribosomal protein S13 rpsM                 |
| DNGNGWU00020 | phenylalanyl-tRNA synthetase alpha subunit |
| DNGNGWU00021 | ribosomal protein L15                      |
| DNGNGWU00022 | ribosomal protein L25/L23                  |
| DNGNGWU00023 | ribosomal protein L6 rplF                  |
| DNGNGWU00024 | ribosomal protein L11 rplK                 |
| DNGNGWU00025 | ribosomal protein L5 rplE                  |
| DNGNGWU00026 | ribosomal protein S12/S23                  |
| DNGNGWU00027 | ribosomal protein L29                      |
| DNGNGWU00028 | ribosomal protein S3 rpsC                  |
| DNGNGWU00029 | ribosomal protein S11 rpsK                 |
| DNGNGWU00030 | ribosomal protein L10                      |
| DNGNGWU00031 | ribosomal protein S8                       |
| DNGNGWU00032 | tRNA pseudouridine synthase B              |
| DNGNGWU00033 | ribosomal protein L18P/L5E                 |
| DNGNGWU00034 | ribosomal protein S15P/S13e                |
| DNGNGWU00035 | Porphobilinogen deaminase                  |
| DNGNGWU00036 | ribosomal protein S17                      |
| DNGNGWU00037 | ribosomal protein L13 rplM                 |
| DNGNGWU00039 | ribonuclease HII                           |
| DNGNGWU00040 | ribosomal protein L24                      |

22 \*The DNGNGWU marker genes in phylsift refer to a suite of single-copy, protein-coding  
 23 marker genes. All 37 DNGNGWU marker genes were concatenated to construct maximum  
 24 likelihood phylogenetic tree.

**Table S3. The sulfhydrogenase subunit in the group 3b hydrogenases of DPANN-HV**

| <b>Protein_id</b> | <b>Bin</b> | <b>Protein clusters</b>          |
|-------------------|------------|----------------------------------|
| WP_029915222.1    | H2.bin.12  | sulfur reductase subunit alpha   |
| WP_028842337.1    | H2.bin.54  | sulfur reductase subunit alpha   |
| WP_013905579.1    | H1.bin.22  | sulfhydrogenase 1 subunit alpha  |
| WP_012970030.1    | H2.bin.48  | sulfur reductase subunit alpha   |
| WP_012506474.1    | H2.bin.78  | /                                |
| WP_011416040.1    | H2.bin.75  | sulfur reductase subunit alpha / |
| WP_008085116.1    | H1.bin.21  | sulfhydrogenase 1 subunit alpha  |
| WP_008085116.1    | H1.bin.39  | sulfhydrogenase 1 subunit alpha  |
| CUU06124.1        | H2.bin.89  | /                                |

26 **Table S4. The classes and representative sequences of fructose-1,6-bisphosphate (FBP)**  
 27 **aldolase and phosphatase**

| Enzymes                                                             | Uniprot_ID | Reference |
|---------------------------------------------------------------------|------------|-----------|
| FBP aldolase class I                                                | Q07159     | (1)       |
| FBP aldolase class II                                               | AAF22441   | (2)       |
| FBP aldolase class IA                                               | BAC21177   | (3)       |
| ADH synthase                                                        | NP_247374  | (4)       |
| FBPase class I                                                      | NP_418653  | (5)       |
| FBPase class II                                                     | P0A9C9     | (6)       |
| FBPase class III                                                    | Q45597     | (7)       |
| FBPase class IV                                                     | NP_247073  | (8)       |
| FBPase class V<br>Fructose 1,6-bisphosphate<br>aldolase/phosphatase | BAC10571   | (3)       |

28 \*Referring to the following article, these genes were chosen (9).

29 \*Abbreviations: FBP aldolase: fructose-1,6-bisphosphate aldolase; FBPase:  
 30 fructose-1,6-bisphosphatase;

31 **References:**

- 32 1. Witke C, Götz F. 1993. Cloning, sequencing, and characterization of the gene encoding the class I  
 33 fructose-1,6-bisphosphate aldolase of *Staphylococcus carnosus*. *Journal of bacteriology* 175:7495-9.
- 34 2. De Montigny C, Sygusch J. 1996. Functional characterization of an extreme thermophilic class II  
 35 fructose-1,6-bisphosphate aldolase. *European journal of biochemistry* 241:243-248.
- 36 3. Rashid N, Imanaka H, Kanai T, Fukui T, Atomi H, Imanaka T. 2002. A novel candidate for the true  
 37 fructose-1,6-bisphosphatase in archaea. *Journal of biological chemistry* 277:30649-30655.
- 38 4. White RH. 2004. Aspartate semialdehyde and a 6-deoxy-5-ketohexose 1-phosphate are the precursors to the  
 39 aromatic amino acids in *Methanocaldococcus jannaschii*. *Biochemistry* 43:7618-7627.
- 40 5. Babul J, Guixé V. 1983. Fructose bisphosphatase from *Escherichia coli*. purification and characterization.  
 41 *Archives of biochemistry and biophysics* 225:944-949.
- 42 6. Donahue JL, Bownas JL, Niehaus WG, Larson TJ. 2000. Purification and characterization of *glp*-encoded  
 43 fructose 1,6-bisphosphatase, a new enzyme of the glycerol 3-phosphate regulon of *Escherichia coli*. *Journal of*  
 44 *bacteriology* 182:5624-5627.
- 45 7. Fujita Y, Freese E. 1979. Purification and properties of fructose-1,6-bisphosphatase of *Bacillus subtilis*. *Journal*  
 46 *of biological chemistry* 254:5340-5349.
- 47 8. Stec B, Yang H, Johnson KA, Chen L, Roberts MF. 2000. MJ0109 is an enzyme that is both an inositol  
 48 monophosphatase and the 'missing' archaeal fructose-1,6-bisphosphatase. *Nature structural biology*  
 49 7:1046-1050.
- 50 9. Say RF, Fuchs G. 2010. Fructose 1,6-bisphosphate aldolase/phosphatase may be an ancestral gluconeogenic  
 51 enzyme. *Nature* 464:1077-1081.

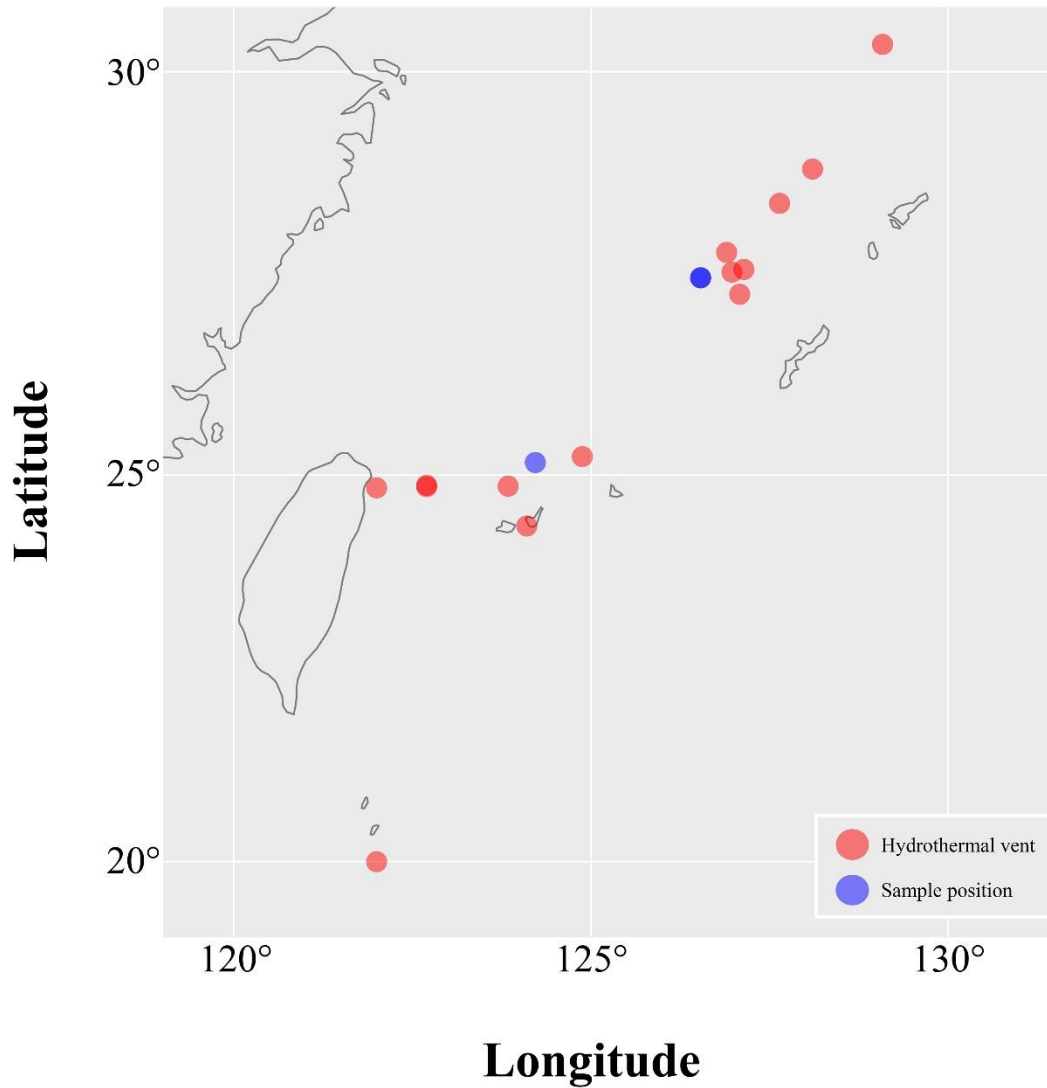

53

54 **Fig. S1. Overview of sampling sites.** The blue points: sampling sites; The red points: nearby  
 55 hydrothermal vents. Sediments from sampling sites were used for DNA extraction and  
 56 metagenomics analysis. Metadata for all sites are summarized in Table S1.

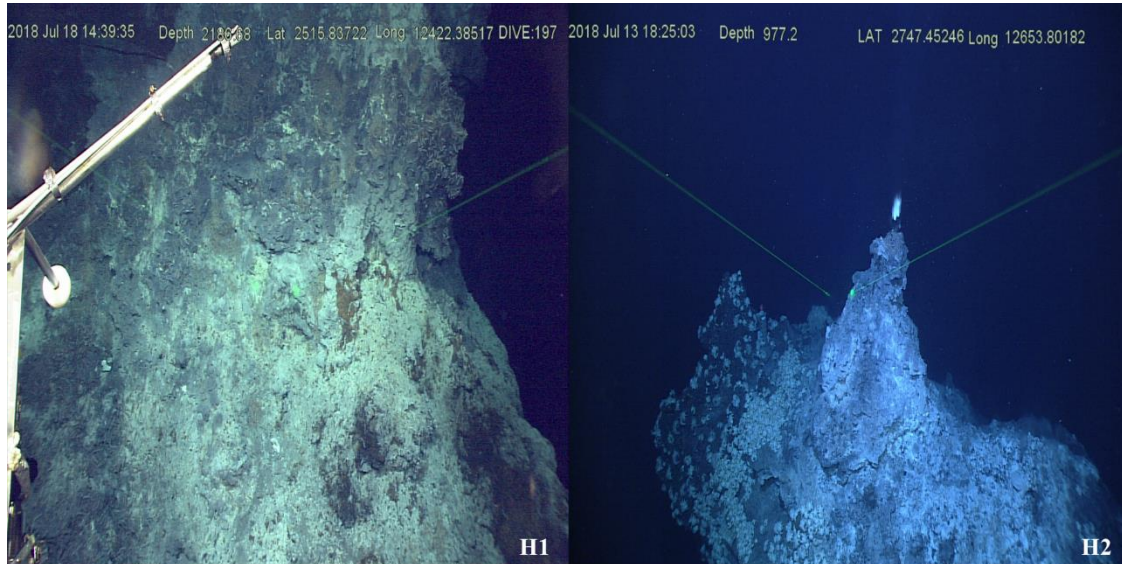

57

58 **Fig S2. *In situ* photos of sampling sites.** In these locations, the typical characteristics of  
59 deep-sea hydrothermal areas such as the faint glow from the black smoker and a large number of  
60 shrimps were observed.

Tree scale: 0.1 ⇄

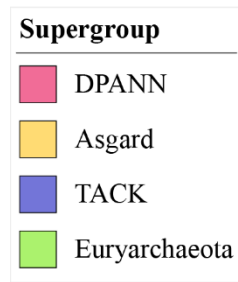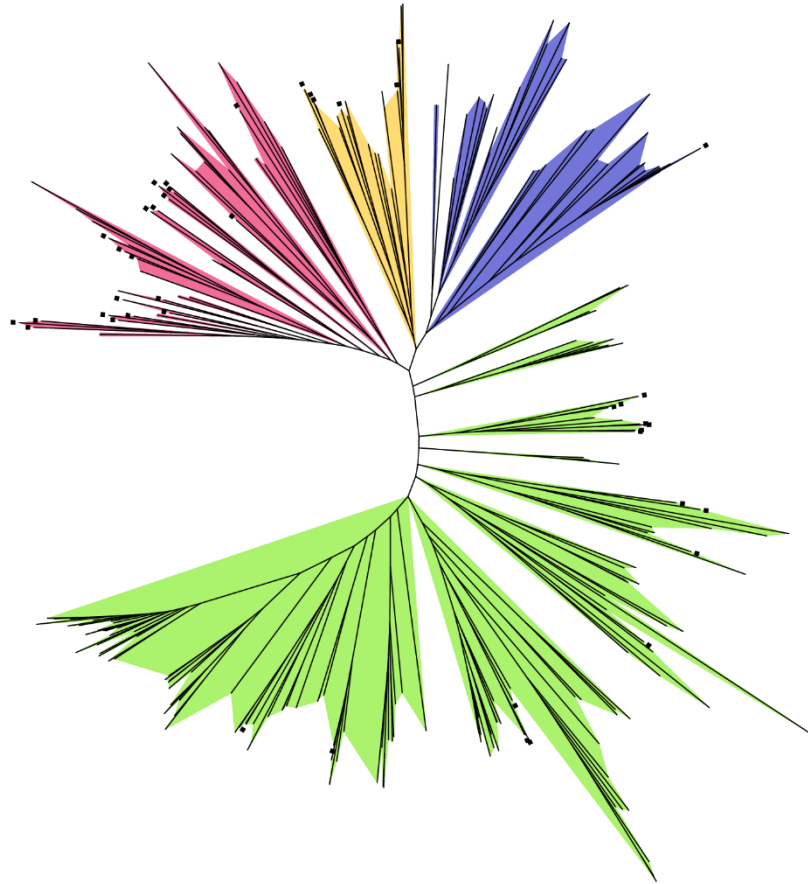

61

62 **Fig. S3. Maximum likelihood phylogenetic tree of referenced archaeal genomes and the**

63 **DPANN-HV genomes.** The red region: DPANN; the yellow region: Asgard; the blue region:

64 TACK; the green region: Euryarchaeota. We used all archaeal genomes assembled from

65 sediments to do phylogenetic analyses and to investigate their distribution. The referenced genes

66 and genomes are recorded in the Table S2 and DATASET S2.



Tree scale: 0.1

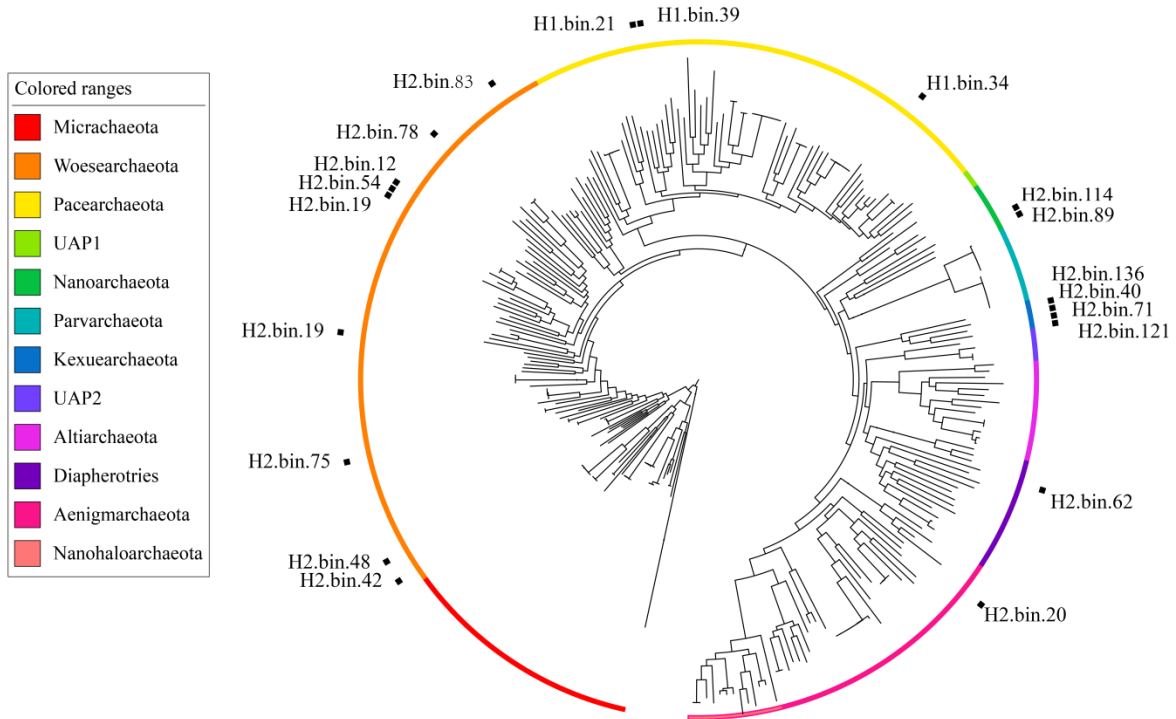

67

68 **Fig. S4. Maximum likelihood phylogenetic tree of referenced DPANN genomes and the**

69 **DPANN-HV genomes.** Used genomes contain the DPANN genomes collected from NCBI and

70 the DPANN-HV assembled genomes. The tree was used for confirming the phylum of each

71 assembled genome. The referenced genes and genomes are recorded in the Table S2 and

72 DATASET S3.

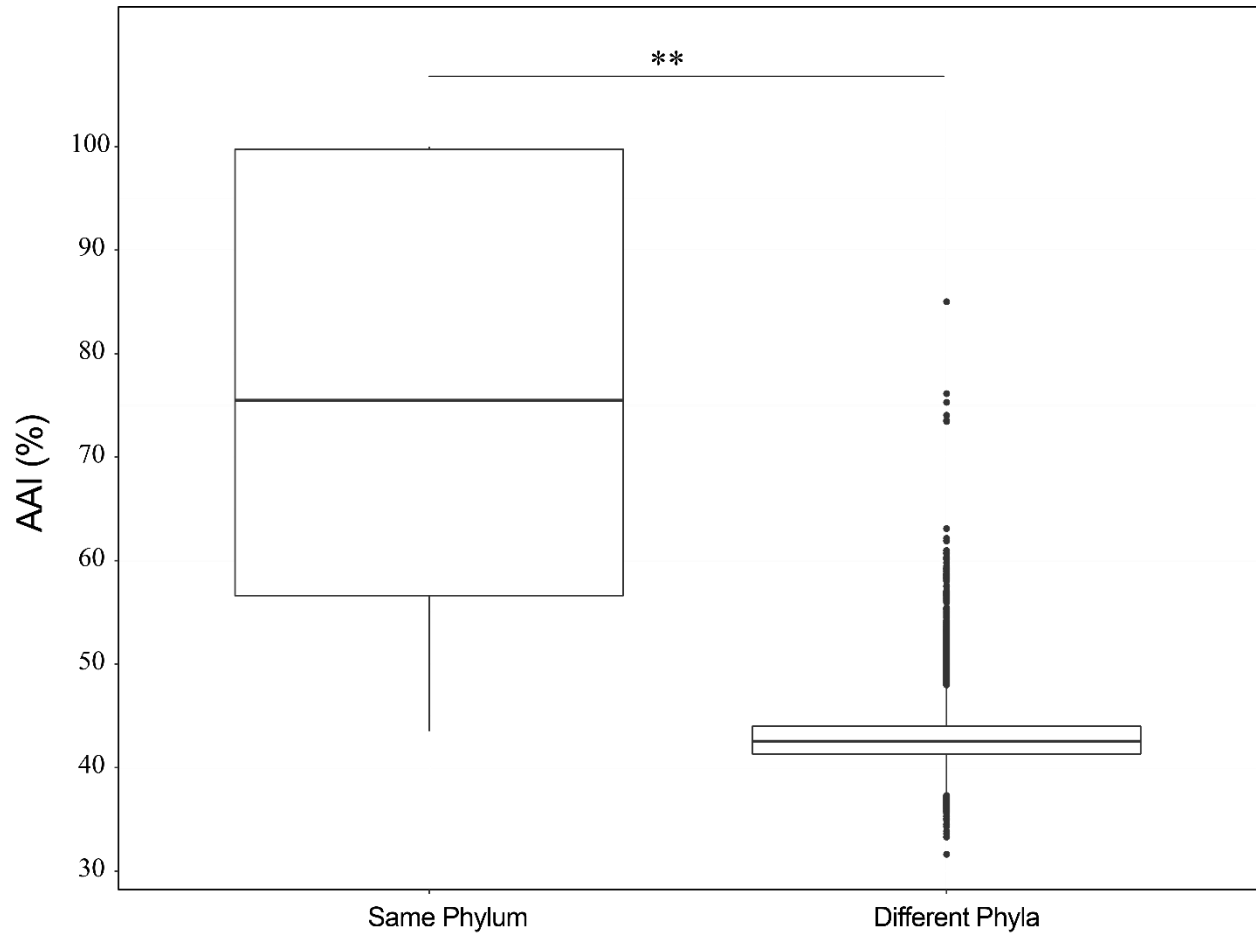

73

74 **Fig. S5. Average amino acid identity of the same phylum and the different phyla in**

75 **referenced DPANN genomes.** The amino acid identity was calculated by CompareM. All data

76 are available in DATASET S4.

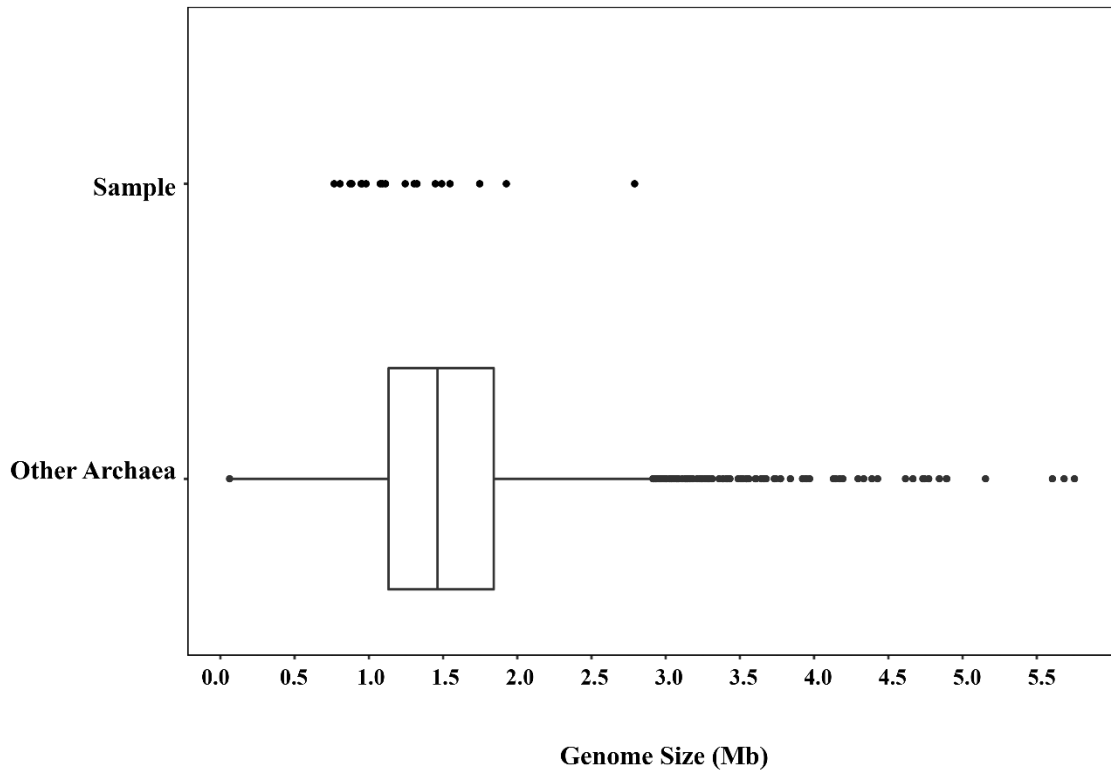

77

78 **Fig. S6. The size ranges of the DPANN-HV genomes and referenced genomes.** The  
 79 referenced genomes contain all archaeal genome sequences except DPANN's in NCBI  
 80 referenced genomes. All data are available in DATASET S3.

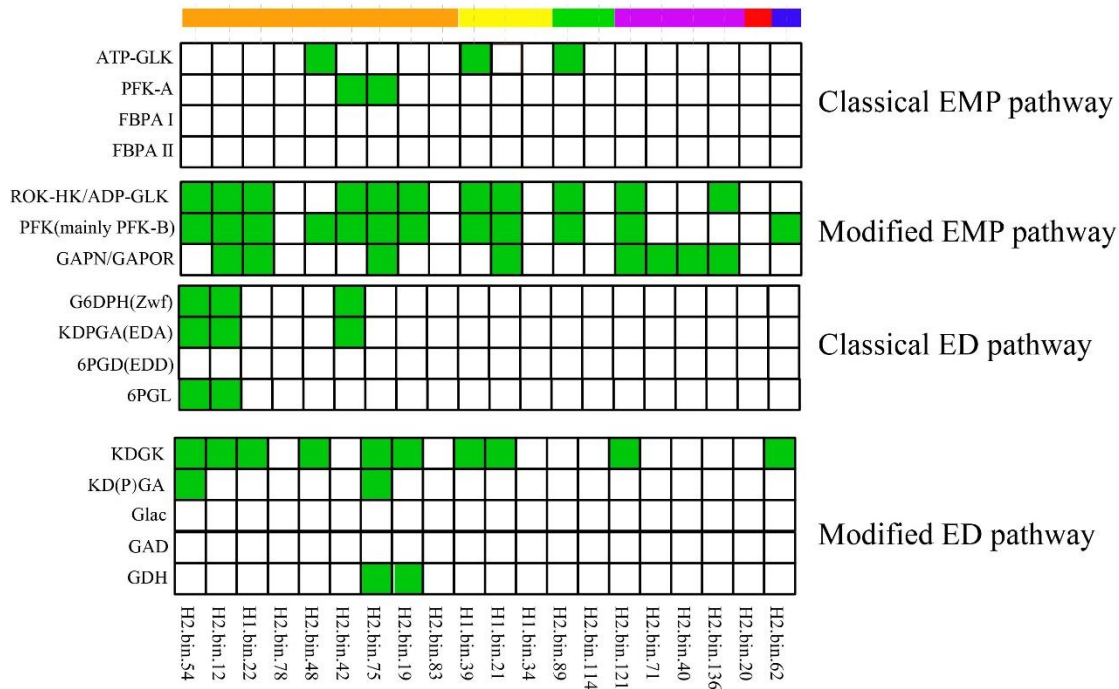

81 ■ Diapherotrites ■ Aenigmarchaeota ■ Kexuearchaeota ■ Nanoarchaeota ■ Pacearchaeota ■ Woesearchaeota

82 **Fig. S7. The distribution of different genes in classical and modified**

83 **Embden-Meyerhof-Parnas (EMP) pathway as well as Entner-Doudoroff (ED) pathway.**

84 ATP-GLK: ATP-dependent glucokinase; PFK-A: ATP-dependent phosphofructokinase

85 (phosphofructokinase family); FBPA I: fructose-1,6-bisphosphate aldolase class I; FBPA II:

86 fructose-1,6-bisphosphate aldolase class II; ROK-HK: ROK hexokinase; PFK:

87 phosphofructokinase; PFK-B: ATP-dependent phosphofructokinase (PFK-B family); ADP-GLK:

88 ADP-dependent glucokinase; GAPN: non-phosphorylating glyceraldehyde-3-phosphate

89 dehydrogenase; GAPOR: ferredoxin (Fd)-dependent glyceraldehyde-3-phosphate oxidoreductase;

90 G6DPH(Zwf): glucose-6-phosphate dehydrogenase (encoded by *Zwf* gene); KDPGA(EDA):

91 2-keto-3-deoxy-6-phosphogluconate aldolase (Entner-Doudoroff aldolase); 6PGD:

92 gluconate-6-phosphate dehydratase; 6PGL: 6-phosphogluconate-d-lactonase; KDGK:

93 2-keto-3-deoxy-d-gluconate kinase; KD(P)GA: 2-keto-3-deoxy-(6-phospho)gluconate aldolase;

94 Glac: gluconolactonase; GAD: gluconate dehydratase; GDH: glucose dehydrogenase. ”/” in this

95 picture is used to present enzymes catalyzing the same substrates and generating the same

96 products used in EMP or ED pathways.

■ Diapherotrites 
 ■ Aenigmarchaeota 
 ■ Kexuearchaeota 
 ■ Nanoarchaeota 
 ■ Pacearchaeota 
 ■ Woesearchaeota

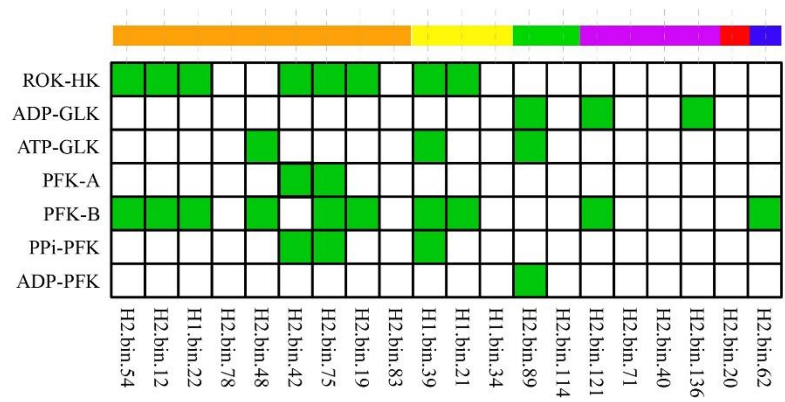

97

98 **Fig. S8. Different types of glucokinase and phosphofructokinase found in DPANN-HV.**

99 ROK-HK: ROK hexokinase; ADP-GLK: ADP-dependent glucokinase; ATP-GLK:

100 ATP-dependent glucokinase; PFK-A: ATP-dependent phosphofructokinase

101 (phosphofructokinase family); PFK-B: ATP-dependent phosphofructokinase (PFK-B family);

102 PP<sub>i</sub>-PFK: PP<sub>i</sub>-dependent phosphofructokinase; ADP-PFK: ADP-dependent phosphofructokinase;

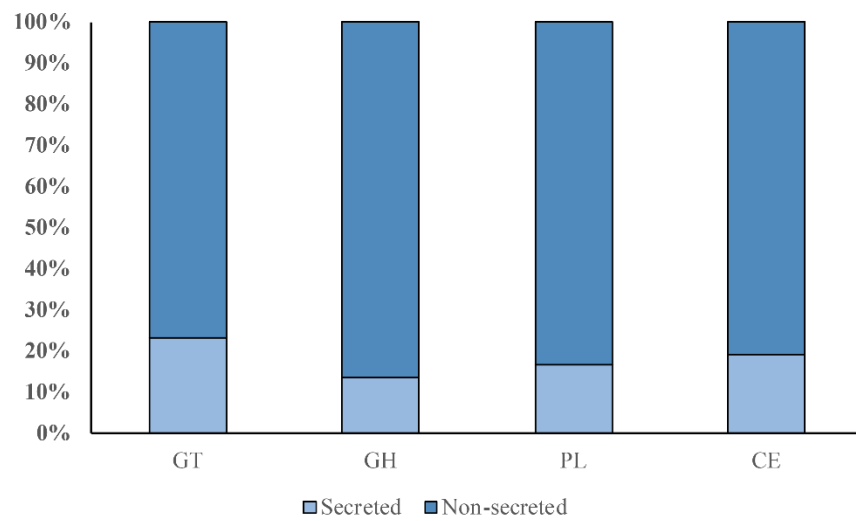

103

104 **Fig. S9. Relative abundance of genes encoding secreted and non-secreted CAZymes in the**

105 **DPANN-HV assembled genomes.** The secreted CAZymes were analyzed using SignalP and

106 phobius. All data are available in DATASET S6.

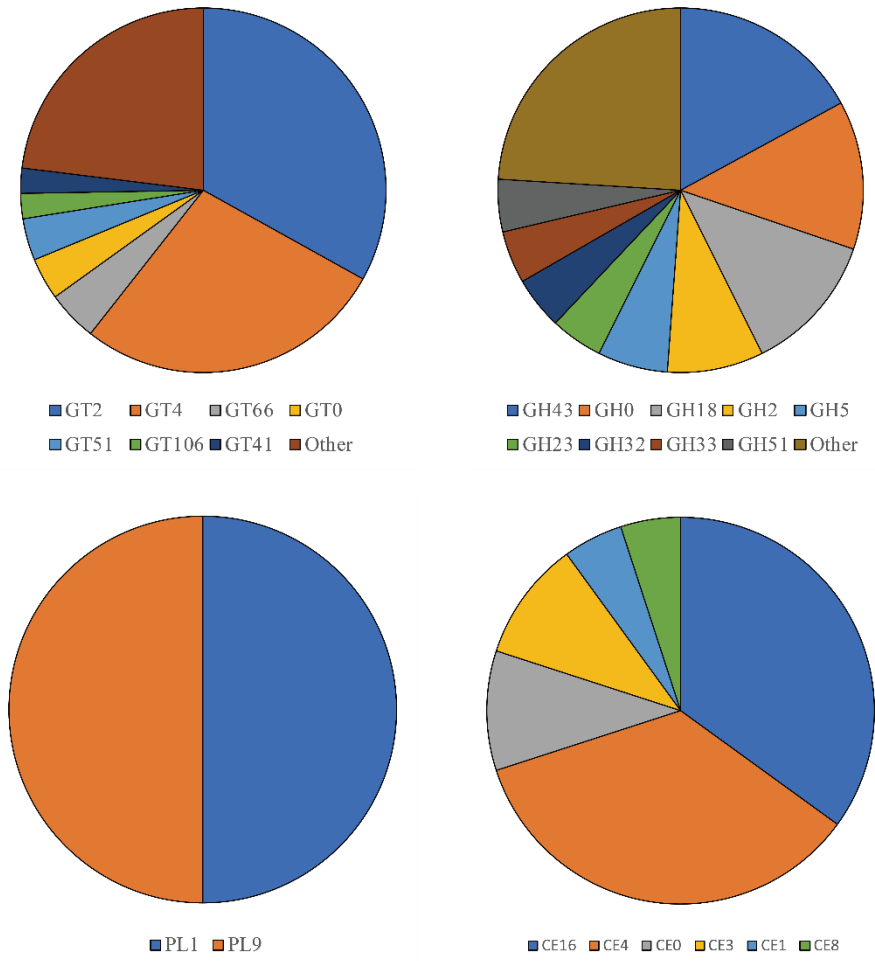

107

108 **Fig. S10. The composition of the secreted CAZymes in the DPANN-HV genomes.** The

109 secreted CAZymes were analyzed using SignalP and phobius. All data are available in

110 DATASET S6.

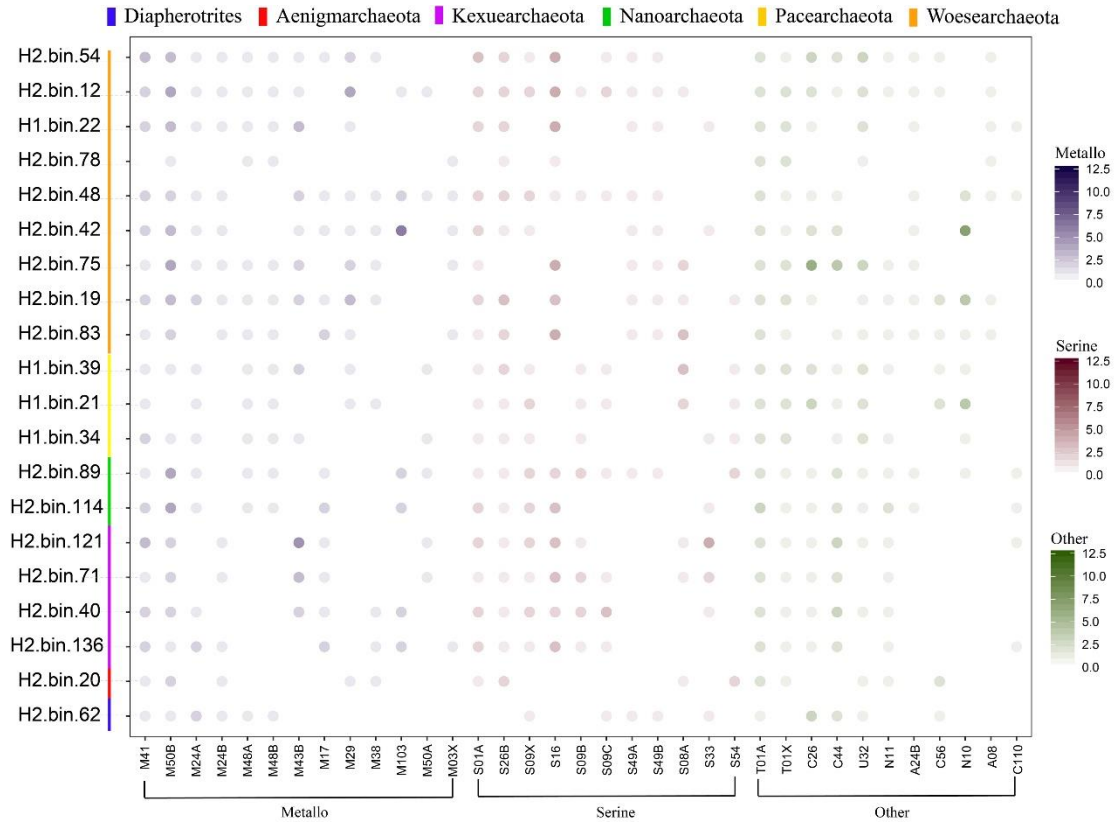

111  
 112 **Fig. S11. Relative abundance of genes encoding peptidases in the DPANN-HV assembled**  
 113 **genomes.** The percentage of genes encoding metallo, serine and other peptidases in each genome  
 114 was summarized. Numbers of genes belonging to different peptidases families per genome are  
 115 presented by circles with different colors. All data are available in DATASET S6.



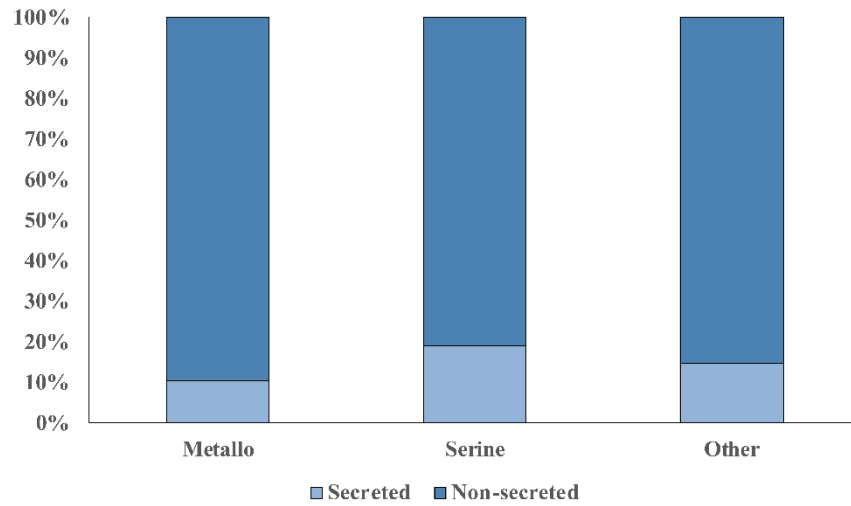

116

117 **Fig. S12. Relative abundance of genes encoding secreted and non-secreted peptidases in the**

118 **DPANN-HV assembled genomes.** The secreted peptidases were analyzed using SignalP and

119 phobius. All data are available in DATASET S6.

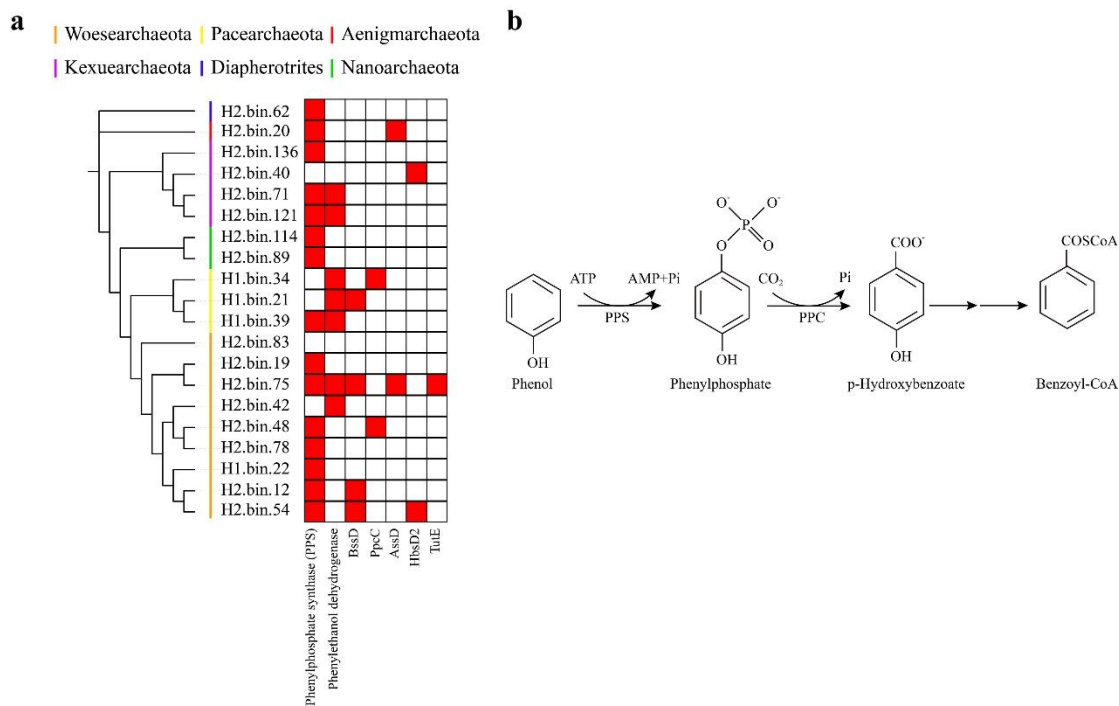

120

121 **Fig. S13. The distribution of anaerobic hydrocarbon degradation genes and the mainly**

122 **possible reaction in the DPANN-HV group. (A) The distribution of anaerobic hydrocarbon**

123 **degradation genes in the DPANN-HV; (B) The mainly possible reactions of anaerobic**

124 **hydrocarbon degradation in the DPANN-HV.**

■ Diapherotrites ■ Aenigmarchaeota ■ Kexuearchaeota ■ Nanoarchaeota ■ Pacearchaeota ■ Woesearchaeota

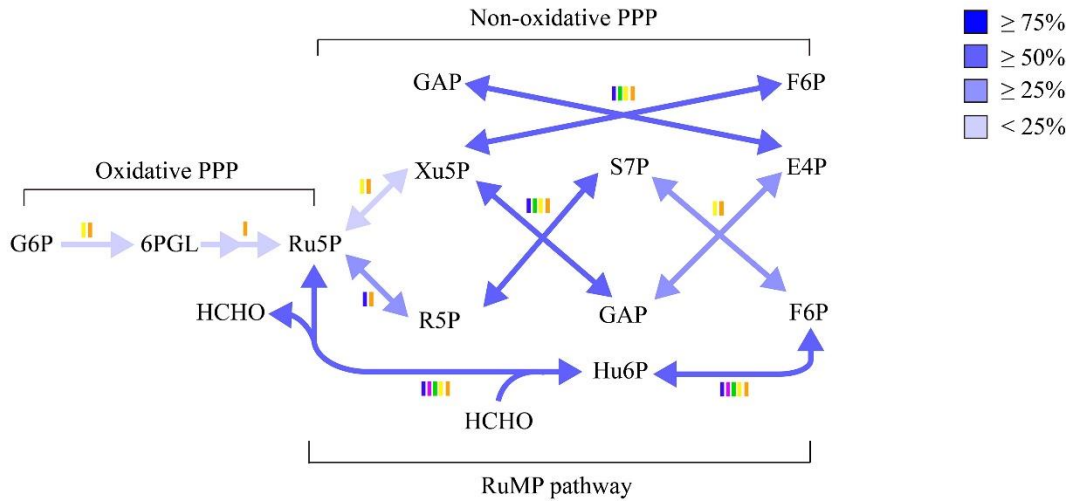

125

126 **Fig. S14. The oxidative pentose phosphate pathway (PPP), non-oxidative PPP and the**

127 **ribulose monophosphate (RuMP) pathway in DPANN-HV. G6P, glucose 6-phosphate; 6PGL,**

128 **6-phosphoglucono- $\delta$ -lactone; Ru5P, ribulose 5-phosphate; Xu5P, xylulose 5-phosphate; R5P,**

129 **ribose 5-phosphate; S7P, sedoheptulose 7-phosphate; GAP, glyceraldehyde 3-phosphate; E4P,**

130 **erythrose 4-phosphate; F6P, fructose 6-phosphate; Hu6P, D-arabino-3-hexulose-6-phosphate.**

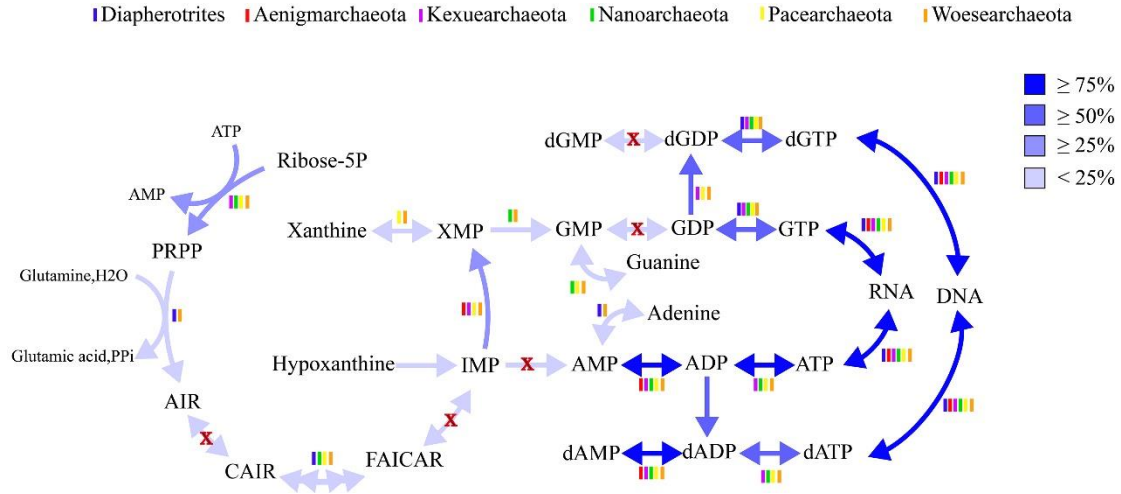

131

132 **Fig. S15. Purine synthesis pathway in the DPANN-HV.** The genes were predicted by KAAS,

133 and the different colors were used for presenting the distribution of genes. PRPP: phosphoribosyl

134 pyrophosphate; AIR: 5-aminoimidazole ribotide; CAIR:

135 5-phosphoribosyl-4-carboxy-5-aminoimidazole; FAICAR:

136 5-formamidoimidazole-4-carboxamide ribotide. All data are available in DATASET S5.

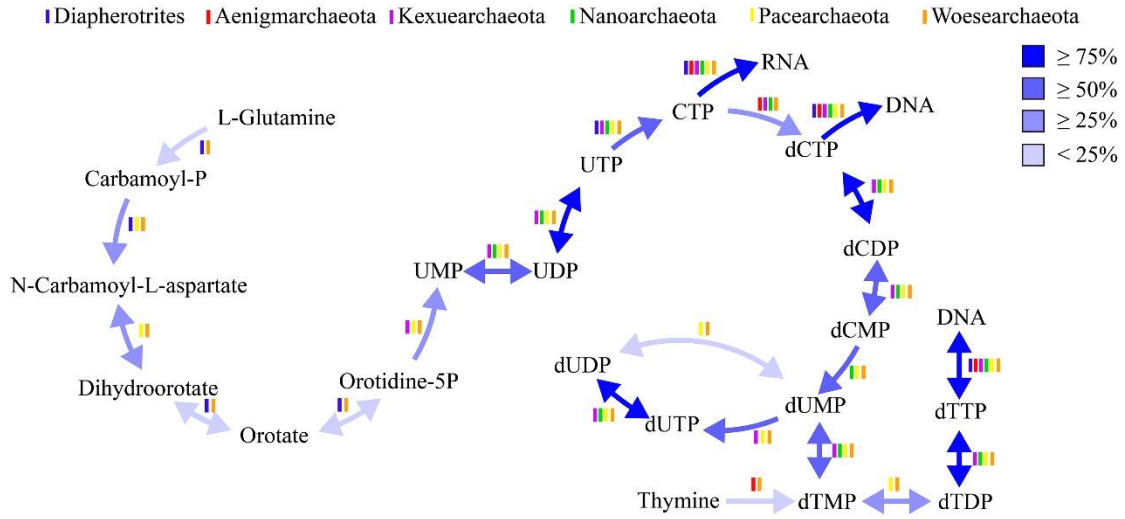

137

138 **Fig. S16. Pyrimidine synthesis pathway in the DPANN-HV.** The genes were predicted by

139 KAAS, and the different colors were used for presenting the distribution of genes. All data are

140 available in DATASET S5.

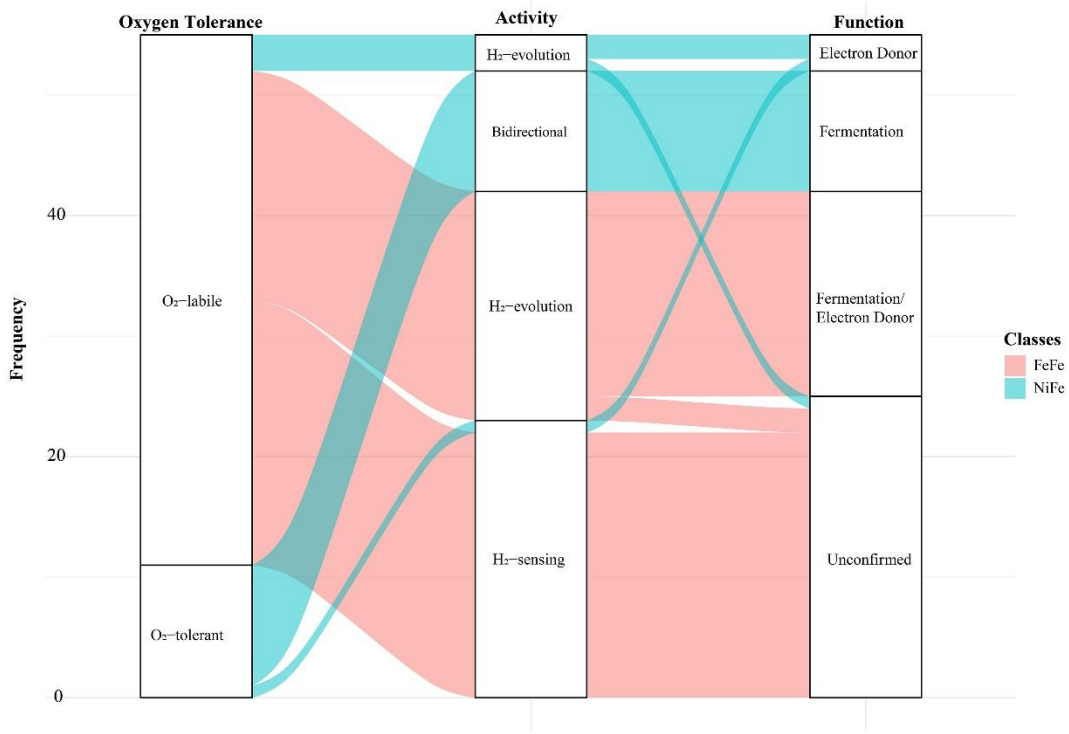

141  
 142 **Fig. S17. The oxygen tolerance, activities and functions of hydrogenases encoded in the**  
 143 **DPANN-HV genomes.** Hydrogenases and features were detected by aligning to the HydDB  
 144 database. All data are available in DATASET S6.

145
